# Supplementary material
Source: PubMed Central journal article supplement (PMC7476305)
Supplement: jnnp-2020-323678supp001.pdf [file jnnp-2020-323678supp001.pdf]

| <b>Blood</b>       | <b>Value<br/>(Normal range)</b> | <b>Unit</b>          | <b>Cerebrospinal fluid</b> | <b>Value<br/>(Normal range)</b> | <b>Unit</b>            |
|--------------------|---------------------------------|----------------------|----------------------------|---------------------------------|------------------------|
| Sodium             | 138 (136-145)                   | mmol.L <sup>-1</sup> | Protein                    | 1.8 (0.15-0.45)                 | g.L <sup>-1</sup>      |
| Potassium          | 5.3 (3.4-4.5)                   | mmol.L <sup>-1</sup> | Glucose                    | 4.8 (2.2-3.9)                   | mmol.L <sup>-1</sup>   |
| Chloride           | 102 (98-107)                    | mmol.L <sup>-1</sup> | Chloride                   | 12 (120-125)                    | mmol.L <sup>-1</sup>   |
| Urea               | 9.1 (2.1-7.1)                   | mmol.L <sup>-1</sup> | Nucleated cells            | 4 (<5)                          | cells.mm <sup>-3</sup> |
| Creatinin          | 68 (59-104)                     | mmol.L <sup>-1</sup> | Albumin                    | 477 (0-350)                     | mg.L <sup>-1</sup>     |
| LDH                | 349 (135-225)                   | IU.L <sup>-1</sup>   | IgG                        | 91.9 (10-30)                    | mg.L <sup>-1</sup>     |
| Albumin            | 27.6 (35-52)                    | g.L <sup>-1</sup>    | Albumin CSF/serum ratio    | 17.3 (<6.5)                     |                        |
| IgG                | 10.7 (7-16)                     | g.L <sup>-1</sup>    | CSF IgG/Albumin ratio      | 0.50 (0-0.65)                   |                        |
| ALT                | 228 (0-40)                      | IU.L <sup>-1</sup>   | <b>PCR</b>                 |                                 |                        |
| CRP                | 11 (< 5)                        | mg.L <sup>-1</sup>   | SARS-CoV 2                 | Negative                        |                        |
| Ferritin           | 600 (30-400)                    | µg.L <sup>-1</sup>   | Epstein Barr virus         | Negative                        |                        |
| Fibrinogen         | 8.0 (2.0-4.0)                   | g.L <sup>-1</sup>    | Herpes simplex virus 1 - 2 | Negative                        |                        |
| D-Dimer            | 3240 (<500)                     | Ng.mL <sup>-1</sup>  | Varicella-Zona             | Negative                        |                        |
| Hemoglobin         | 13.8 (13-17.5)                  | g.dL <sup>-1</sup>   | Enterovirus                | Negative                        |                        |
| Platelet           | 109 (150-400)                   | G.L <sup>-1</sup>    | BK virus                   | Negative                        |                        |
| Neutrophil         | 12.1 (2-7.5)                    | G.L <sup>-1</sup>    | JC virus                   | Negative                        |                        |
| Lymphocytes        | 1.0 (1.5-4)                     | G.L <sup>-1</sup>    | Listeria monocytogenes     | Negative                        |                        |
| Schizocyte         | Absent                          |                      | <b>Culture</b>             | Negative                        |                        |
| HIV-1PCR           | Negative                        |                      |                            |                                 |                        |
| Culture            | Negative                        |                      |                            |                                 |                        |
| <b>Bone marrow</b> |                                 |                      | <b>Tracheal aspiration</b> |                                 |                        |
|                    | Normal cell density             |                      | <b>Culture</b>             | Negative                        |                        |
|                    | No phagocytosis                 |                      | <b>PCR</b>                 |                                 |                        |
|                    |                                 |                      | SARS CoV 2                 | Negative                        |                        |
|                    |                                 |                      | Rhinovirus                 | Negative                        |                        |
|                    |                                 |                      | Adenovirus                 | Negative                        |                        |
|                    |                                 |                      | Metapneumovirus            | Negative                        |                        |

**Supplementary table 1: Blood, cerebrospinal fluid, myelogram and lung sampling after neurological worsening (day 21).** Abbreviations: PCR : Polymerase Chain Reaction, HIV : Human Immunodeficiency virus, SARS-CoV-2 : Severe Acute Respiratory Syndrome Coronavirus 2, CRP : C Reactive Protein, LDH : Lactate Deshydrogenase, ALT : Alanine Transaminase, IgG: Immunoglobulin G.
